# Supplementary material for: Comparative analysis on the expression of L1 loci using various RNA-Seq preparations
Source: PubMed Central journal article supplement (PMC6945437; doi:10.1186/s13100-019-0194-z), 2020-01-06

### A. All full length L1s by subfamily

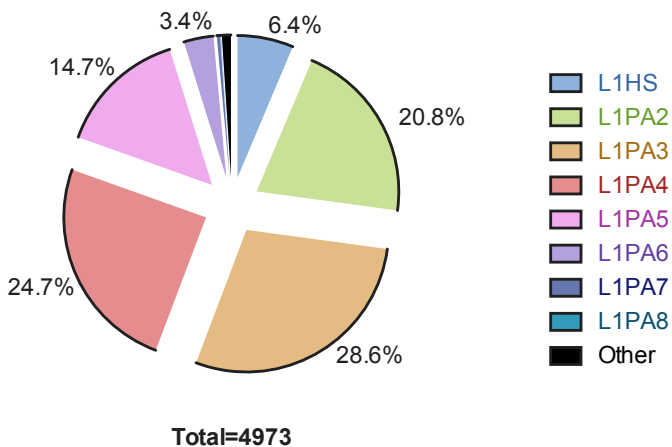

### B. Expressed L1s in whole cell

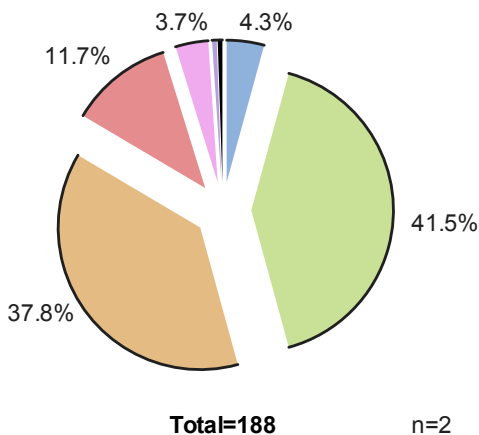

### C. Expressed L1s in cytoplasm

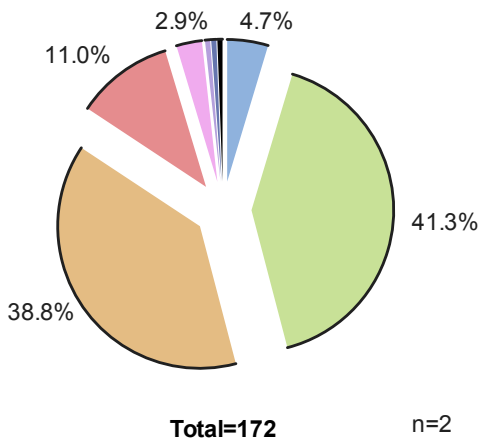

Supplement: 13100_2019_194_MOESM7_ESM.pdf [file 13100_2019_194_MOESM7_ESM.pdf]
