# Supplementary material for: Comparative analysis on the expression of L1 loci using various RNA-Seq preparations
Source: PubMed Central journal article supplement (PMC6945437; doi:10.1186/s13100-019-0194-z), 2020-01-06

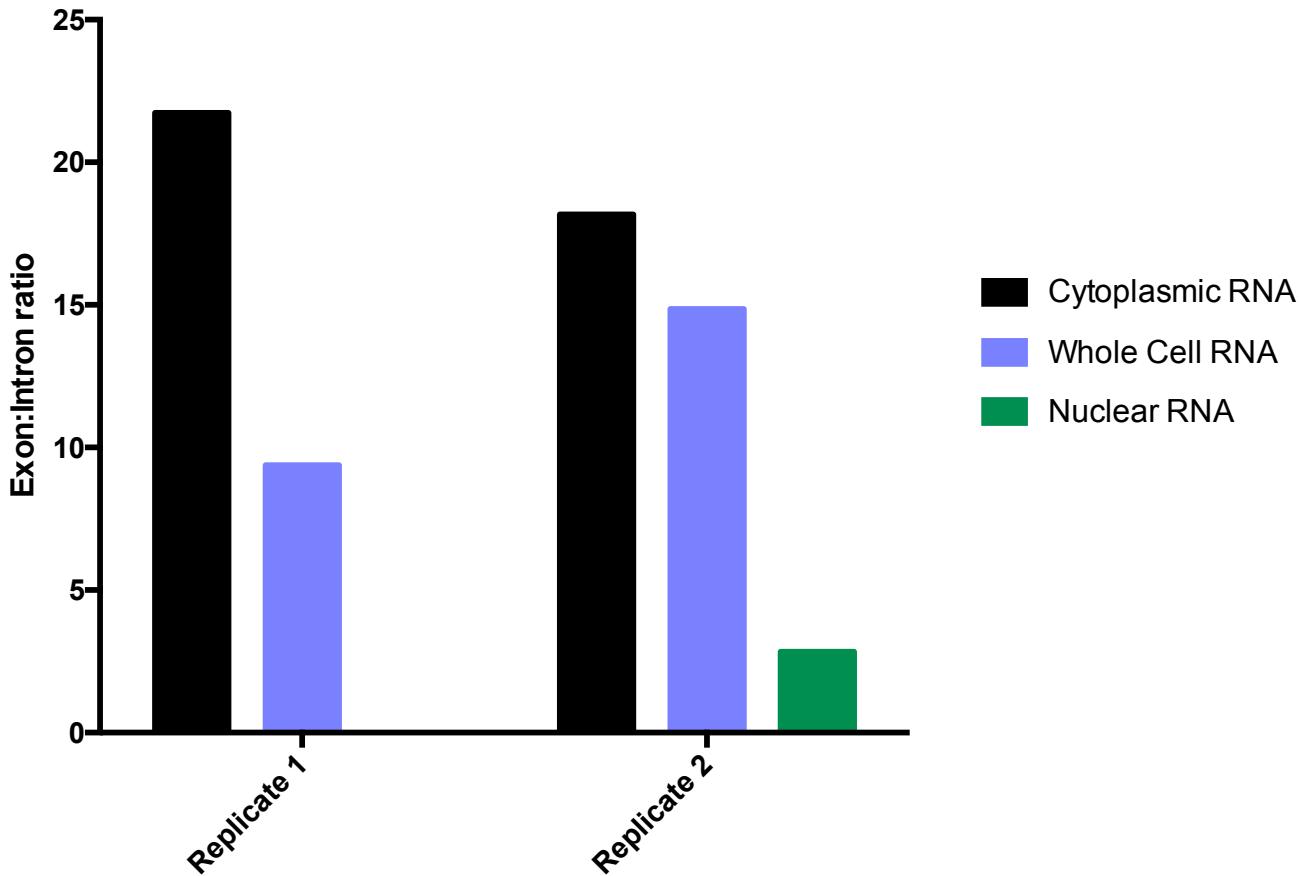

Supplement: 13100_2019_194_MOESM8_ESM.pdf [file 13100_2019_194_MOESM8_ESM.pdf]
